# Supplementary material
Source: MDPI journal article supplement (https://www.mdpi.com/2073-4433/14/10/1586)
Supplement: s1 [file s1]

# Supplementary Materials: The Impact of Anthropogenic VOC Emissions on Atmospheric Pollution: A Case Study of a Typical Industrialized Area in China

Xin Gao <sup>1</sup>, Yanan Wang <sup>1</sup>, Lin Wu <sup>1,\*</sup>, Fangyuan Zheng <sup>1</sup>, Naixiu Sun <sup>1</sup>, Guangxun Liu <sup>2</sup>, Yongji Liu <sup>3</sup>, Peng Meng <sup>3</sup>, Luna Sun <sup>1</sup> and Boyu Jing <sup>4,\*</sup>

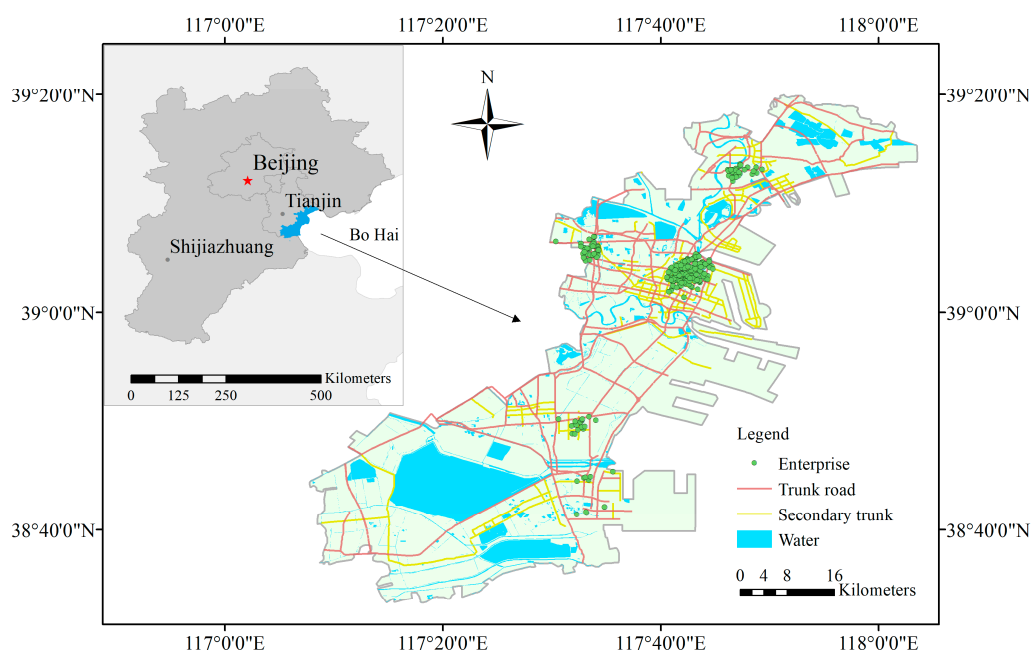

Figure S1. Study area.

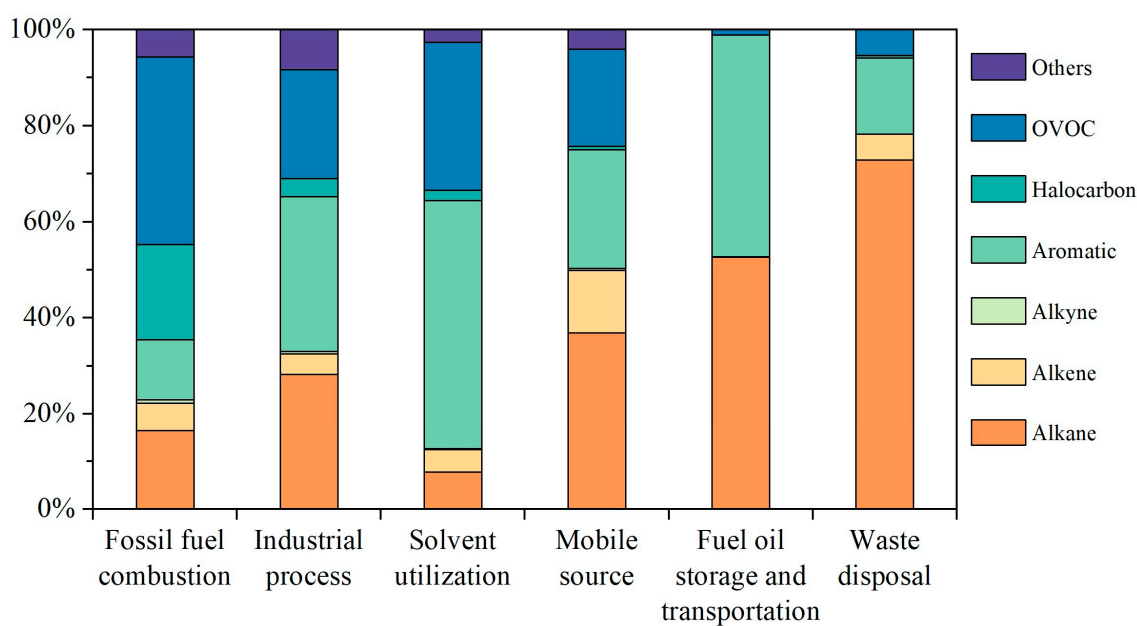

Figure S2. Composition of VOCs in emission sources.

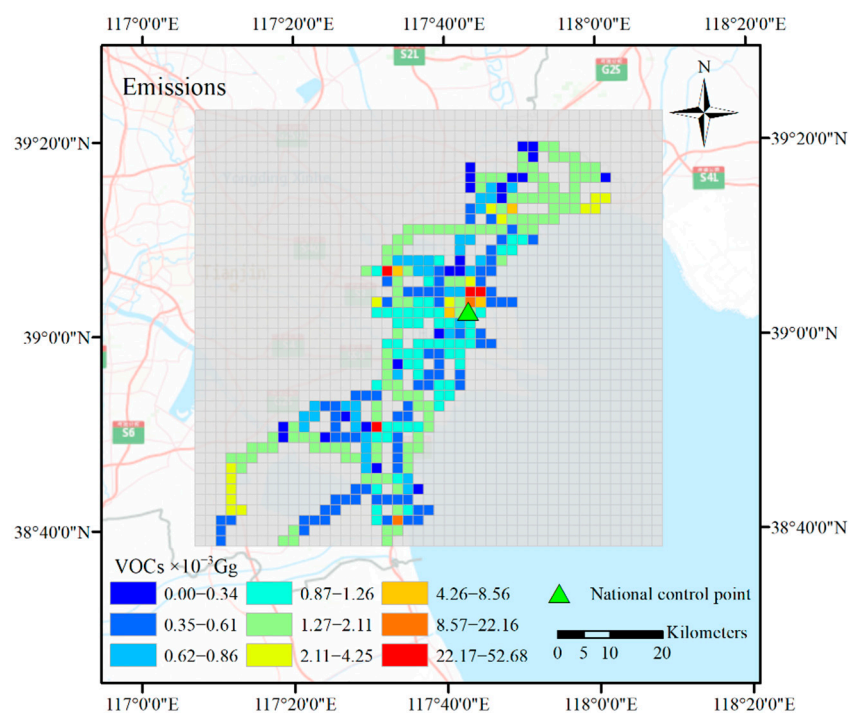

**Figure S3.** VOC emissions spatial distribution.

(As model input file)

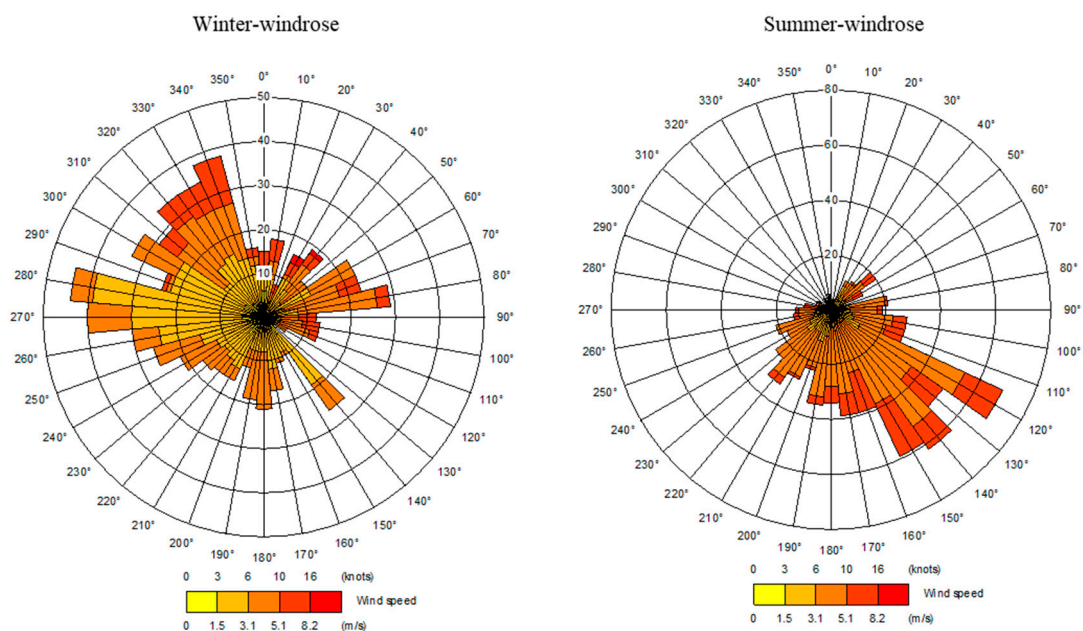

**Figure S4.** Windrose.

**Table S1.** Source classification and emission factors.

| Level 1                | Level 2    | Level 3          | Emission factor | Unit | Ref.             |
|------------------------|------------|------------------|-----------------|------|------------------|
| Number                 | Sub-source |                  |                 |      |                  |
| Stationary fossil fuel | 1          | Power generation | Coal            | 0.04 | g/kg             |
|                        |            |                  | Natural gas     | 0.02 | g/m <sup>3</sup> |
|                        | 2          | Thermal          | Coal            | 0.04 | g/kg             |

(HE  
K.2015)

| Level 1                    | Level 2        | Level 3                                                                                                                 | Emission factor                                                                                                                      | Unit                                  | Ref.             |
|----------------------------|----------------|-------------------------------------------------------------------------------------------------------------------------|--------------------------------------------------------------------------------------------------------------------------------------|---------------------------------------|------------------|
| Number                     | Sub-source     |                                                                                                                         |                                                                                                                                      |                                       |                  |
| combustion                 | 3              | Industrial combustion                                                                                                   | Fuel oil                                                                                                                             | 2.88                                  | g/kg             |
|                            |                |                                                                                                                         | Natural gas                                                                                                                          | 0.12                                  | g/m <sup>3</sup> |
|                            | 4              | Non-metal mineral product                                                                                               | Glass/ceramic                                                                                                                        | 4.40/29.22                            | g/kg             |
|                            |                |                                                                                                                         | Wood-based panel                                                                                                                     | 0.5                                   | g/m <sup>3</sup> |
|                            | 5              | Petroleum processing and coking industry                                                                                | Coke/crude oil production/processing/refining                                                                                        | 2.96/1.42/0.32/1.82                   | g/kg             |
|                            |                |                                                                                                                         | Polyvinyl chloride/polystyrene/high-density polyethylene/polypropylene/urea/compound fertilizer/ink/dye/architectural paint/adhesive | 0.74/5.40/5.70/3/0.01/0/5/81.40/15/20 | g/kg             |
| Industrial process         | 7              | Rubber and plastic manufacturing                                                                                        | Foam/faux leather                                                                                                                    | 770/0.18                              | g/kg             |
|                            |                |                                                                                                                         | Tires                                                                                                                                | 0.91                                  | kg/ piece        |
|                            | 8              | Wine production                                                                                                         | Alcohol/beer/wine/liquor                                                                                                             | 218.25/0.25/0.50/25                   | g/kg             |
|                            | 9              | Food production                                                                                                         | Bread/pastries/biscuits/bacon                                                                                                        | 10.62/1/1/0.14                        | g/kg             |
|                            | 10             | Agricultural and sideline food processing                                                                               | Sugar/corn oil/peanut oil/soybean oil                                                                                                | 8/9.35/10.35/2.45                     | g/kg             |
|                            | 11             | Other industrial processes                                                                                              | Polyester/nylon/pulp/silk/cloth                                                                                                      | 0.7/3.30/3.10/10/10                   | g/kg             |
| Solvent utilization        | 12             | Printing and dyeing                                                                                                     | Traditional ink printing/New ink printing/dye printing                                                                               | 750/100/81.40                         | g/kg             |
|                            |                |                                                                                                                         | Waterborne architectural coatings/solvent-based architectural coatings/Wood furniture coating                                        | 120/450/640                           | g/kg             |
|                            |                |                                                                                                                         | Car painting/bicycle painting/motorcycle painting                                                                                    | 21.20/0.30/1.80                       | kg/ vehicle      |
|                            | 13             | Surface coating                                                                                                         | Metal furniture coating/home appliance coating/equipment manufacturing coating                                                       | 0.20/0.20/0.40                        | kg/ piece        |
|                            |                |                                                                                                                         | Wood production                                                                                                                      | 0.22                                  | g/m <sup>3</sup> |
|                            |                |                                                                                                                         | Adhesive use                                                                                                                         | 85                                    | g/kg             |
| Mobile source              | 14             | Other utilization                                                                                                       | Office supplies                                                                                                                      | 25                                    | t/ factory/year  |
|                            |                |                                                                                                                         |                                                                                                                                      |                                       |                  |
|                            |                |                                                                                                                         |                                                                                                                                      |                                       |                  |
| Storage and transportation | 15/16/17/18/19 | Light-duty gasoline vehicles/heavy-duty gasoline vehicles/light-duty diesel trucks/heavy-duty diesel trucks/motorcycles |                                                                                                                                      |                                       | (MEE,2014)       |
| Waste disposal             | 20             | Gas station                                                                                                             | Gasoline                                                                                                                             | 3.24                                  | g/kg             |
|                            | 21             |                                                                                                                         | Diesel                                                                                                                               | 0.08                                  | g/kg             |
|                            | 22             | Solid waste treatment                                                                                                   | Garbage                                                                                                                              | 0.74                                  | g/kg             |

**Table S2.** VOC Species MIR and OFP ( $\times 10^{-3}$  Gg).

|    | Chemical groups | Species name           | CAS       | MIR    | OFP( $\times 10^{-3}$ Gg) |
|----|-----------------|------------------------|-----------|--------|---------------------------|
| 1  | Alkane          | Ethane                 | 74-84-0   | 0.321  | 10.05                     |
| 2  | Alkane          | Propane                | 74-98-6   | 0.563  | 13.82                     |
| 3  | Alkane          | i-Butane               | 75-28-5   | 1.300  | 13.57                     |
| 4  | Alkane          | n-Butane               | 106-97-8  | 1.330  | 22.85                     |
| 5  | Alkane          | Cyclopentane           | 287-92-3  | 2.370  | 4.66                      |
| 6  | Alkane          | i-Pentane              | 78-78-4   | 1.650  | 99.34                     |
| 7  | Alkane          | n-Pentane              | 109-66-0  | 1.560  | 33.78                     |
| 8  | Alkane          | Methylcyclopentane     | 96-37-7   | 2.230  | 14.33                     |
| 9  | Alkane          | Cyclohexane            | 110-82-7  | 1.810  | 65.48                     |
| 10 | Alkane          | 2,2-Dimethylbutane     | 75-83-2   | 1.300  | 4.67                      |
| 11 | Alkane          | 2,3-Dimethylbutane     | 79-29-8   | 1.090  | 7.03                      |
| 12 | Alkane          | 2-Methylpentane        | 107-83-5  | 1.770  | 37.05                     |
| 13 | Alkane          | 3-Methylpentane        | 96-14-0   | 2.090  | 39.25                     |
| 14 | Alkane          | n-Hexane               | 110-54-3  | 1.550  | 92.89                     |
| 15 | Alkane          | n-Heptane              | 142-82-5  | 1.370  | 14.05                     |
| 16 | Alkane          | Isoheptane             | 591-76-4  | 1.570  | 11.63                     |
| 17 | Alkane          | 3-Methylhexane         | 589-34-4  | 1.910  | 14.71                     |
| 18 | Alkane          | 2,3-Dimethylpentane    | 565-59-3  | 1.550  | 5.64                      |
| 19 | Alkane          | 2,4-Dimethylpentane    | 108-08-7  | 1.760  | 11.40                     |
| 20 | Alkane          | Ethylcyclohexane       | 1678-91-7 | 1.820  | 0.23                      |
| 21 | Alkane          | 2,2,4-Trimethylpentane | 540-84-1  | 1.380  | 15.40                     |
| 22 | Alkane          | 2,3,4-Trimethylpentane | 565-75-3  | 1.200  | 5.59                      |
| 23 | Alkane          | 2-Methylheptane        | 592-27-8  | 1.370  | 4.31                      |
| 24 | Alkane          | 3-Methylheptane        | 589-81-1  | 1.530  | 5.54                      |
| 25 | Alkane          | Methylcyclohexane      | 108-87-2  | 1.860  | 14.72                     |
| 26 | Alkane          | n-Octane               | 111-65-9  | 1.150  | 7.85                      |
| 27 | Alkane          | n-Nonane               | 111-84-2  | 1.030  | 6.53                      |
| 28 | Alkane          | n-Decane               | 124-18-5  | 0.926  | 15.28                     |
| 29 | Alkane          | n-Undecane             | 1120-21-4 | 0.849  | 19.44                     |
| 30 | Alkane          | n-Dodecane             | 112-40-3  | 0.785  | 26.36                     |
| 31 | Alkene          | Ethene                 | 74-85-1   | 8.640  | 353.62                    |
| 32 | Alkene          | Propene                | 115-07-1  | 10.800 | 333.11                    |
| 33 | Alkene          | 1,3-Butadiene          | 106-99-0  | 11.500 | 87.43                     |
| 34 | Alkene          | 1-Butene               | 106-98-9  | 9.300  | 179.49                    |
| 35 | Alkene          | i-butene               | 115-11-7  | 5.370  | 15.40                     |
| 36 | Alkene          | cis-2-Butene           | 590-18-1  | 12.200 | 35.10                     |
| 37 | Alkene          | trans-2-Butene         | 624-64-6  | 12.500 | 47.06                     |
| 38 | Alkene          | Isoprene               | 78-79-5   | 9.710  | 5.51                      |
| 39 | Alkene          | 1-Pentene              | 109-67-1  | 6.920  | 20.71                     |
| 40 | Alkene          | cis-2-Pentene          | 627-20-3  | 9.620  | 9.58                      |
| 41 | Others          | Acrylonitrile          | 107-13-1  | 2.210  | 20.18                     |
| 42 | Alkene          | trans-2-Pentene        | 646-04-8  | 9.740  | 15.51                     |
| 43 | Alkene          | 3-Methyl-1-butene      | 563-45-1  | 6.750  | 0.81                      |
| 44 | Alkene          | 2-Methyl-1-butene      | 563-46-2  | 5.740  | 2.55                      |
| 45 | Alkene          | 2-Methyl-2-butene      | 513-35-9  | 10.400 | 8.93                      |
| 46 | Alkene          | 1-Hexene               | 592-41-6  | 5.470  | 33.64                     |
| 47 | Alkene          | cis-2-Hexene           | 7688-21-3 | 7.760  | 0.97                      |
| 48 | Alkene          | 2-Methyl-1-pentene     | 763-29-1  | 4.730  | 0.97                      |
| 49 | Alkyne          | Ethyne                 | 74-86-2   | 0.944  | 4.39                      |

|    | Chemical groups | Species name                 | CAS               | MIR   | OFP( $\times 10^{-3}$ Gg) |
|----|-----------------|------------------------------|-------------------|-------|---------------------------|
| 50 | Aromatic        | Benzene                      | 71-43-2           | 0.787 | 36.93                     |
| 51 | Aromatic        | Toluene                      | 108-88-3          | 4.020 | 383.29                    |
| 52 | Aromatic        | Ethylbenzene                 | 100-41-4          | 3.110 | 209.04                    |
| 53 | Aromatic        | o-Xylene                     | 95-47-6           | 7.170 | 250.48                    |
| 54 | Aromatic        | m/p-Xylene                   | 108-38-3/106-42-3 | 6.990 | 453.11                    |
| 55 | Aromatic        | Xylene                       | 1330-20-7         | 7.110 | 32.25                     |
| 56 | Aromatic        | Styrene                      | 100-42-5          | 1.700 | 68.98                     |
| 57 | Aromatic        | 1,2,3-Trimethylbenzene       | 526-73-8          | 9.860 | 121.00                    |
| 58 | Aromatic        | 1,2,4-Trimethylbenzene       | 95-63-6           | 7.880 | 262.56                    |
| 59 | Aromatic        | 1,3,5-Trimethylbenzene       | 108-67-8          | 9.350 | 112.33                    |
| 60 | Aromatic        | n-Propylbenzene              | 103-65-1          | 2.150 | 10.73                     |
| 61 | Aromatic        | Isopropylbenzene             | 98-82-8           | 2.580 | 9.12                      |
| 62 | Aromatic        | o-Ethyltoluene               | 611-14-3          | 5.330 | 60.70                     |
| 63 | Aromatic        | m-Ethyltoluene               | 620-14-4          | 6.700 | 176.29                    |
| 64 | Aromatic        | p-Ethyltoluene               | 622-96-8          | 4.280 | 44.06                     |
| 65 | Aromatic        | o-Diethylbenzene             | 135-01-3          | 5.140 | 2.04                      |
| 66 | Aromatic        | m-Diethylbenzene             | 141-93-5          | 6.300 | 16.38                     |
| 67 | Aromatic        | p-Diethylbenzene             | 105-05-5          | 4.180 | 18.18                     |
| 68 | Aromatic        | 1-Methyl-3-propylbenzene     | 1074-43-7         | 6.300 | 1.55                      |
| 69 | Aromatic        | 1-Methyl-4-propylbenzene     | 1074-55-1         | 4.180 | 0.49                      |
| 70 | Aromatic        | 2-Ethyl-1,4-dimethyl-benzene | 1758-88-9         | 6.720 | 3.30                      |
| 71 | Aromatic        | 1-Ethyl-2,4-dimethylbenzene  | 874-41-9          | 6.720 | 1.82                      |
| 72 | Aromatic        | Naphthalene                  | 91-20-3           | 3.130 | 11.40                     |
| 73 | Halocarbon      | Chloroform                   | 67-66-3           | 0.026 | 0.06                      |
| 74 | Halocarbon      | Dichloromethane              | 75-09-2           | 0.049 | 0.42                      |
| 75 | Halocarbon      | Chloromethane                | 74-87-3           | 0.042 | 0.06                      |
| 76 | Halocarbon      | Methyl bromide               | 74-83-9           | 0.021 | 0.01                      |
| 77 | Halocarbon      | Tetrachloroethylene          | 127-18-4          | 0.037 | 0.07                      |
| 78 | Halocarbon      | Trichloroethylene            | 79-01-6           | 0.746 | 0.34                      |
| 79 | Halocarbon      | 1,1-Dichloroethylene         | 75-35-4           | 2.080 | 0.22                      |
| 80 | Halocarbon      | 1,1,1-Trichloroethane        | 71-55-6           | 0.005 | 0.00                      |
| 81 | Halocarbon      | Vinyl chloride               | 75-01-4           | 3.190 | 9.06                      |
| 82 | Halocarbon      | 1,1,2-Trichloroethane        | 79-00-5           | 0.094 | 0.97                      |
| 83 | Halocarbon      | 1,1-Dichloroethane           | 75-34-3           | 0.084 | 0.01                      |
| 84 | Halocarbon      | 1,2-Dichloroethane           | 107-06-2          | 0.228 | 1.36                      |
| 85 | Halocarbon      | Chloroethane                 | 75-00-3           | 0.343 | 0.19                      |
| 86 | Halocarbon      | cis-1,3-Dichloropropene      | 10061-01-5        | 3.660 | 1.49                      |
| 87 | Halocarbon      | trans-1,3-Dichloropropene    | 10061-02-6        | 4.730 | 15.13                     |
| 88 | Halocarbon      | 1,2-Dichloropropane          | 78-87-5           | 0.319 | 0.43                      |
| 89 | Halocarbon      | 1,2-Dichlorobenzene          | 95-50-1           | 0.197 | 0.08                      |
| 90 | Halocarbon      | 1,4-Dichlorobenzene          | 106-46-7          | 0.197 | 0.12                      |
| 91 | Halocarbon      | Chlorobenzene                | 108-90-7          | 0.351 | 0.52                      |
| 92 | Halocarbon      | Dibromoethane                | 106-93-4          | 0.108 | 0.03                      |
| 93 | Halocarbon      | Trans-1,2-Dichloroethylene   | 156-60-5          | 1.800 | 0.28                      |
| 94 | OVOC            | Methanol                     | 67-56-1           | 0.668 | 6.39                      |
| 95 | OVOC            | Ethanol                      | 64-17-5           | 1.790 | 54.39                     |
| 96 | OVOC            | Ethylene glycol              | 107-21-1          | 3.400 | 14.26                     |
| 97 | OVOC            | Propylene glycol             | 57-55-6           | 2.470 | 3.31                      |
| 98 | OVOC            | Isopropanol                  | 67-63-0           | 0.644 | 12.38                     |

|     | Chemical groups | Species name                     | CAS       | MIR    | OFP( $\times 10^{-3}$ Gg) |
|-----|-----------------|----------------------------------|-----------|--------|---------------------------|
| 99  | OVOC            | n-Butanol                        | 71-36-3   | 3.270  | 20.88                     |
| 100 | OVOC            | Diethylene glycol                | 111-46-6  | 3.960  | 3.84                      |
| 101 | OVOC            | 2-Ethyl-1-hexanol                | 104-76-7  | 2.290  | 0.35                      |
| 102 | OVOC            | 2-Methyl-2-propanol              | 75-65-0   | 0.424  | 0.34                      |
| 103 | OVOC            | Isobutanol                       | 78-83-1   | 2.750  | 0.34                      |
| 104 | OVOC            | Formaldehyde                     | 50-00-0   | 7.160  | 379.33                    |
| 105 | OVOC            | Acetaldehyde                     | 75-07-0   | 6.070  | 47.62                     |
| 106 | OVOC            | Acrolein                         | 107-02-8  | 6.980  | 31.41                     |
| 107 | OVOC            | Propionaldehyde/Propanal         | 123-38-6  | 6.780  | 31.49                     |
| 108 | OVOC            | Crotonaldehyde                   | 4170-30-3 | 8.180  | 2.90                      |
| 109 | OVOC            | Methacrolein                     | 78-85-3   | 5.430  | 14.92                     |
| 110 | OVOC            | Isovaleraldehyde                 | 590-86-3  | 4.690  | 7.18                      |
| 111 | OVOC            | Heptaldehyde                     | 111-71-7  | 3.550  | 15.19                     |
| 112 | OVOC            | Octanal                          | 124-13-0  | 3.060  | 3.19                      |
| 113 | OVOC            | o-Tolualdehyde                   | 529-20-4  | -0.29  | -0.09                     |
| 114 | OVOC            | 2,5-Dimethylbenzaldehyde         | 5779-94-2 | -0.26  | -0.81                     |
| 115 | OVOC            | Tolualdehyde                     | 1334-78-7 | -0.29  | -0.94                     |
| 116 | OVOC            | Acetone                          | 67-64-1   | 0.343  | 24.82                     |
| 117 | OVOC            | Methylethylketone                | 78-93-3   | 1.530  | 43.78                     |
| 118 | OVOC            | Diacetyl                         | 431-03-8  | 13.500 | 8.30                      |
| 119 | OVOC            | 2-pentanone                      | 107-87-9  | 3.060  | 1.75                      |
| 120 | OVOC            | 3-Pentanone                      | 96-22-0   | 1.430  | 0.14                      |
| 121 | OVOC            | Cyclohexanone                    | 108-94-1  | 1.660  | 2.64                      |
| 122 | OVOC            | 4-Methyl-2-Pentanone             | 108-10-1  | 3.810  | 60.31                     |
| 123 | OVOC            | Methyl Vinyl ketone              | 78-94-4   | 9.060  | 8.33                      |
| 124 | OVOC            | Methyl n-butyl ketone            | 563-80-4  | 1.780  | 0.30                      |
| 125 | OVOC            | 2-Hexanone                       | 591-78-6  | 3.470  | 3.28                      |
| 126 | OVOC            | Methyl acetate                   | 79-20-9   | 0.079  | 0.11                      |
| 127 | OVOC            | Vinyl acetate                    | 108-05-4  | 2.870  | 60.39                     |
| 128 | OVOC            | Ethyl acetate                    | 141-78-6  | 0.721  | 32.14                     |
| 129 | OVOC            | Methyl methacrylate              | 80-62-6   | 11.700 | 17.99                     |
| 130 | OVOC            | 1-Methoxy-2-propylacetate        | 108-65-6  | 1.790  | 9.94                      |
| 131 | OVOC            | Isobutyl acetate                 | 110-19-0  | 0.695  | 0.10                      |
| 132 | OVOC            | sec-Butyl acetate                | 105-46-4  | 1.510  | 18.73                     |
| 133 | OVOC            | Carbonic acid , dimethyl ester   | 616-38-6  | 0.065  | 0.01                      |
| 134 | OVOC            | Aceticacid,1-methylethylester    | 108-21-4  | 1.100  | 0.11                      |
| 135 | OVOC            | 2-Pentanol,acetate               | 628-63-7  | 1.180  | 0.14                      |
| 136 | OVOC            | MTBE/methyl tertiary butyl ether | 1634-04-4 | 0.785  | 4.58                      |
| 137 | OVOC            | 2-Butoxyethanol                  | 111-76-2  | 3.000  | 7.21                      |
| 138 | OVOC            | 1,4-Dioxane                      | 123-91-1  | 2.680  | 5.57                      |
| 139 | OVOC            | Dimethoxymethane                 | 109-87-5  | 1.490  | 2.05                      |
| 140 | OVOC            | Tetrahydrofuran                  | 109-99-9  | 4.770  | 19.99                     |

Table S3. VOC Species  $Y_{SOA}$  and SOAP (%).

|   | Chemical groups | Species                | CAS                   | Avg. $Y_{SOA}$ (%) | SOAP (%) |
|---|-----------------|------------------------|-----------------------|--------------------|----------|
| 1 | Aromatic        | 1,2,4-trimethylbenzene | 95-63-6               | 2.01               | 0.78     |
| 2 | Aromatic        | m/p-xylene             | 108-38-3/<br>106-42-3 | 7.05               | 5.32     |
| 3 | Alkane          | n-undecane             | 1120-21-4             | 33                 | 8.79     |
| 4 | Alkane          | methylcyclohexane      | 108-87-2              | 22                 | 2.03     |

|    | Chemical groups | Species                          | CAS       | Avg. Y <sub>SOA</sub> (%) | SOAP (%) |
|----|-----------------|----------------------------------|-----------|---------------------------|----------|
| 5  | Aromatic        | o-ethyltoluene                   | 611-14-3  | 5.6                       | 0.74     |
| 6  | Aromatic        | 1,3,5-trimethylbenzene           | 108-67-8  | 2.1                       | 0.29     |
| 7  | Aromatic        | p-ethyltoluene                   | 622-96-8  | 2.5                       | 0.30     |
| 8  | Aromatic        | p-diethylbenzene                 | 105-05-5  | 6.3                       | 0.32     |
| 9  | Alkane          | 2,2,4-trimethylpentane           | 540-84-1  | 4.8                       | 0.62     |
| 10 | Alkane          | 2-methylheptane                  | 592-27-8  | 4.8                       | 0.18     |
| 11 | OVOC            | MTBE/methyl tertiary butyl ether | 1634-04-4 | 0.1                       | 0.01     |
| 12 | OVOC            | methylethylketone                | 78-93-3   | 0.78                      | 0.26     |
| 13 | Aromatic        | n-propylbenzene                  | 103-65-1  | 1.6                       | 0.09     |
| 14 | OVOC            | 4-methyl-2-pentanone             | 108-10-1  | 0.78                      | 0.14     |
| 15 | Aromatic        | o-xylene                         | 95-47-6   | 10                        | 4.06     |
| 16 | Alkane          | cyclohexane                      | 110-82-7  | 0.17                      | 0.07     |
| 17 | Alkane          | methylcyclopentane               | 96-37-7   | 0.17                      | 0.01     |
| 18 | Aromatic        | Isopropylbenzene                 | 98-82-8   | 4                         | 0.16     |
| 19 | Alkane          | n-nonane                         | 111-84-2  | 13                        | 1.03     |
| 20 | Alkene          | isoprene                         | 78-79-5   | 0.79                      | 0.01     |
| 21 | Alkane          | n-heptane                        | 142-82-5  | 4.8                       | 0.57     |
| 22 | Alkene          | 1-hexene                         | 592-41-6  | 2                         | 0.14     |
| 23 | Alkane          | n-octane                         | 111-65-9  | 5.8                       | 0.46     |
| 24 | Alkane          | cyclopentane                     | 287-92-3  | 4                         | 0.09     |
| 25 | Alkane          | n-dodecane                       | 112-40-3  | 44                        | 17.19    |
| 26 | Alkene          | 1,3-butadiene                    | 106-99-0  | 13                        | 1.15     |
| 27 | Aromatic        | m-diethylbenzene                 | 141-93-5  | 6.3                       | 0.19     |
| 28 | Aromatic        | m-ethyltoluene                   | 620-14-4  | 6.3                       | 1.93     |
| 29 | Aromatic        | styrene                          | 100-42-5  | 3.9                       | 1.84     |
| 30 | Alkane          | 2,3,4-trimethylpentane           | 565-75-3  | 4.8                       | 0.26     |
| 31 | OVOC            | heptaldehyde                     | 111-71-7  | 9.3                       | 0.46     |
| 32 | OVOC            | methyl vinyl ketone              | 78-94-4   | 0.78                      | 0.01     |
| 33 | OVOC            | acetone                          | 67-64-1   | 0.78                      | 0.66     |
| 34 | OVOC            | octanal                          | 124-13-0  | 9.3                       | 0.11     |
| 35 | OVOC            | isovaleraldehyde                 | 590-86-3  | 9.3                       | 0.17     |
| 36 | Halocarbon      | chlorobenzene                    | 108-90-7  | 5.4                       | 0.09     |
| 37 | Halocarbon      | 1,4-dichlorobenzene              | 106-46-7  | 1.6                       | 0.01     |
| 38 | Aromatic        | benzene                          | 71-43-2   | 0.93                      | 0.51     |
| 39 | Aromatic        | toluene                          | 108-88-3  | 36                        | 39.93    |
| 40 | Halocarbon      | 1,3-dichlorobenzene              | 541-73-1  | 1.6                       | 0.01     |
| 41 | Aromatic        | ethylbenzene                     | 100-41-4  | 5.4                       | 4.22     |
| 42 | Halocarbon      | 1,2-dichlorobenzene              | 95-50-1   | 1.6                       | 0.01     |
| 43 | Aromatic        | o-diethylbenzene                 | 135-01-3  | 6.3                       | 0.03     |
| 44 | Alkane          | n-decane                         | 124-18-5  | 22                        | 4.22     |
| 45 | OVOC            | 2-pentanone                      | 107-87-9  | 0.78                      | 0.01     |
| 46 | Aromatic        | 1,2,3-trimethylbenzene           | 526-73-8  | 2.1                       | 0.30     |
| 47 | OVOC            | 3-pentanone                      | 96-22-0   | 0.78                      | 0.00     |
| 48 | Alkane          | 3-methylheptane                  | 589-81-1  | 4.8                       | 0.20     |
